# Supplementary material
Source: PubMed Central journal article supplement (PMC2757961)
Supplement: supp_M109.025452_jbc.M109.025452-1.pdf [file supp_M109.025452_jbc.M109.025452-1.pdf]

## **SUPPLEMENTAL TABLE 1 PRIMERS USED in the STUDY**

| <b>Primers for gene expression analysis</b> |                                          | <b>Species</b> |
|---------------------------------------------|------------------------------------------|----------------|
| rANGPTL4/2/258/Fo                           | AGACCCGAAGGATAGAGTCCC                    | rat            |
| rANGPTL4/2/364/Re                           | CCTTCTGGAACAGTTGCTGG                     | rat            |
| mANGPTL4/2/Fo                               | AAGATGCACAGCATCACAGG                     | mouse          |
| mANGPTL4/2/Re                               | ATGGATGGGAAATTGGAGC                      | mouse          |
| hANGPTL4/Fo                                 | ATTCTTTCCAGCGGCTTCTG                     | human          |
| hANGPTL4/Re                                 | GAGGACTGGAGACGCGGAG                      | human          |
| hRPL19/Fo                                   | ATCGATCGAAGAGTGTATCA                     | human          |
| hRPL19/Re                                   | GCGTGCTTCCTTGGTCTTAG                     | human          |
| rRPL19-2/Fo                                 | ACAAGCGGATTCTCATGGAG                     | rat            |
| rRPL19-2/Re                                 | TCCTTGGTCTTAGACCTGCG                     | rat            |
| mRPL19-2/Fo                                 | ATGGAGCACATCCACAAGC                      | mouse          |
| mRPL19-2/Re                                 | TCCTTGGTCTTAGACCTGCG                     | mouse          |
| rANGPTL3/617/Fo                             | CTGGCATTCAAGAACCCACT                     | rat            |
| rANGPTL3/741/Re                             | AGAGCAGTCAGCAGGCAGAT                     | rat            |
| mCD36/Fo                                    | CCTCCAGAATCCAGACAACC                     | mouse          |
| mCD36/Re                                    | CACAGGCTTTCCTTCTTTGC                     | mouse          |
| hPER1/878/Fo                                | AGGAGAAGTCCGCTTCTGC                      | human          |
| hPER1/976/Re                                | GGATCTTGGTCACATACGGG                     | human          |
| hABCD4/10/Fo                                | GAGAAAGAAAGCCCAGAGCC                     | human          |
| hABCD4/122/Re                               | CGCAGCATCTTTCATAGGAG                     | human          |
| rPEPCK/Fo                                   | GGGAGTTTATCAAGTGCCTCC                    | rat            |
| rPEPCK/Re                                   | AGGTGAGCAATCAGGGTCAG                     | rat            |
| <br>                                        |                                          |                |
| <b>Primers for ChIP</b>                     |                                          |                |
| rRPL19-2/Fo                                 | ACAAGCGGATTCTCATGGAG                     | rat            |
| rmRPL19-2/Re                                | TCCTTGGTCTTAGACCTGCG                     | rat            |
| mRPL19-2/Fo                                 | ATGGAGCACATCCACAAGC                      | mouse          |
| rmRPL19-2/Re                                | TCCTTGGTCTTAGACCTGCG                     | mouse          |
| rFIAF/+5-5.5kb/Fo                           | GTGCTCTCAGTCTGGAACCC                     | rat            |
| rFIAF/+5-5.5kb/Re                           | GCCGTGGAATAGAGTGAAG                      | rat            |
| rFIAF-+5745-ChIP-Fo                         | GCTCAGCCATCAGGTAAGG                      | rat            |
| rFIAF-+5838-ChIP-Re                         | TGGGAGTCGGTGATCTTTT                      | rat            |
| rFIAF/6541/F                                | TTGACCCGACTGGAGATAGGG                    | rat            |
| rFIAF/6653/R                                | ATGTTGTGAGCTGTGCCTTG                     | rat            |
| rFIAF-+6945-ChIP-Fo                         | GGCTCCCAACCTTCACATAG                     | rat            |
| rFIAF-+7049-ChIP-Re                         | ATAGGAGCCTGTGGAGGTCA                     | rat            |
| <br>                                        |                                          |                |
| <b>Primers for Luciferase reporter gene</b> |                                          |                |
| Fo_KpnI_rFIAF_A                             | gctgcaGGTACCgctctgttacctgctatgtgaaggtt   | rat            |
| Re_XhoI_rFIAF_A                             | cgctctCTCGAGtgtagatgcagagggaccatttcagtcc | rat            |
| <br>                                        |                                          |                |
| Primers for site-directed mutagenesis       |                                          |                |
| FIAFGRBSmut/fo                              | CAACCTCAGAACATTTAGATCTCTGTTGTCTCG        | rat            |
| FIAFFRBSmut/re                              | CGAGACAACAGAGATCTAAATGTTCTGAGGTTG        | rat            |
| <br>                                        |                                          |                |
| <b>Primers for nuclear Run-on</b>           |                                          |                |
| B-actin_firstExon_Fo                        | tagccctctttgtgccttg                      | rat            |
| B-actin_firstIntron_Re                      | tgccactcccaaagtaaagg                     | rat            |
| rFIAF_Fo                                    | gggtgtagcctgtagtga                       | rat            |
| rFIAF_Re                                    | ctgtagggtgctggtggtt                      | rat            |
